# Supplementary material
Source: publisher figshare collection journal article supplement (https://karger.figshare.com/ndownloader/files/26704619)
Supplement: Supplementary file 1 [file 26704619]

|  |  | Female | | | Male | | | Total | | |
| --- | --- | --- | --- | --- | --- | --- | --- | --- | --- | --- |
|  | **Sampling age (days)** | n | Average | Spread | n | Average | Spread | n | Average | Spread |
| T4* | 4 | 167 | 88 | 16 | 180 | 86 | 15 | 347 | 87 | 16 |
| 5 | 242 | 88 | 16 | 253 | 85 | 17 | 495 | 87 | 17 |
| 6 | 219 | 85 | 13 | 253 | 82 | 15 | 472 | 83 | 14 |
| 7 | 163 | 83 | 14 | 193 | 82 | 14 | 356 | 82 | 14 |
| Total | 791 | 86 | 15 | 879 | 84 | 15 | 1670 | 85 | 15 |
| TSH* | 4 | 167 | 1.3 | 0.9-1.8 | 180 | 1.3 | 0.9-2.0 | 347 | 1.3 | 0.9-1.8 |
| 5 | 242 | 1.2 | 0.8-1.7 | 253 | 1.1 | 0.7-1.6 | 495 | 1.1 | 0.8-1.6 |
| 6 | 219 | 1.1 | 0.8-1.5 | 253 | 1.1 | 0.8-1.6 | 472 | 1.1 | 0.8-1.5 |
| 7 | 163 | 1.1 | 0.8-1.4 | 193 | 1.1 | 0.8-1.5 | 356 | 1.1 | 0.8-1.5 |
| Total | 791 | 1.2 | 0.8-1.6 | 879 | 1.1 | 0.8-1.6 | 1670 | 1.1 | 0.8-1.6 |
| TBG* | 4 | 167 | 186 | 38 | 180 | 178 | 35 | 347 | 182 | 37 |
| 5 | 242 | 189 | 40 | 253 | 183 | 41 | 495 | 186 | 41 |
| 6 | 219 | 189 | 39 | 253 | 185 | 44 | 472 | 187 | 42 |
| 7 | 163 | 190 | 36 | 193 | 187 | 39 | 356 | 188 | 38 |
| Total | 791 | 189 | 39 | 879 | 183 | 40 | 1670 | 186 | 40 |
| T4/ TBG ratio* | 4 | 167 | 29 | 6 | 180 | 30 | 6 | 347 | 29 | 6 |
| 5 | 242 | 29 | 5 | 253 | 29 | 5 | 495 | 29 | 5 |
| 6 | 219 | 28 | 5 | 253 | 28 | 6 | 472 | 28 | 5 |
| 7 | 163 | 27 | 5 | 193 | 27 | 5 | 356 | 27 | 5 |
| Total | 791 | 28 | 5 | 879 | 28 | 5 | 1670 | 28 | 5 |

Table S1. Descriptive statistics of measured T4, TSH and TBG concentrations, and the calculated T4/TBG ratio for all reference subjects combined and divided by sex and NBS sampling age.

Abbreviations: NBS = newborn screening, T4 = thyroxine (nmol/L blood), TBG = thyroxine binding globuline (nmol/L), TSH = thyroid stimulating hormone (mIU/L blood).
*The average and spread are presented as mean and standard deviation for T4, TBG and T4/TBG ratio, and as median and interquartile range (Q1 and Q3) for TSH.
